# Supplementary material
Source: Copernicus journal article supplement (doi:10.5194/bg-23-2885-2026)
Supplement: Supplementary file 1 [file Supplementary materials_Nitrogen_FM.pdf › Supplement_nitrogen_FM/Supplementary materials_Nitrogen_FM.pdf]

## **Supplementary Materials and Methods**

### **S1. Taxonomic annotation with FROGS pipeline**

The tool « FROGS\_1 Pre-process » merges read 1 and read 2, removes primers from the right sequences, removes sequences of the wrong size, and with "ambiguous" bases N. These tools were used with default parameters and for « Reads 1 size; Reads 2 size; Minimum amplicon size and Maximum amplicon size », respectively: 250; 250; 200 and 700 bp. A total of 596,512 sequences remains after this stage. The tools « FROGS\_2 Clustering swarm » and « FROGS\_3 Remove chimera » were used with default parameters to cluster the sequences at 97% identity and remove possible chimera. This step removed 28.9% of the Operational Taxonomic Units (OTUs), representing 2.7% of the total sequences, and resulted in 25,462 OTUs. Then, « FROGS\_4 Cluster Filters » was used to select only OTUs represented by at least two sequences, with default parameters, and to remove contaminant clusters (e.g., chloroplast and mitochondria) using the contaminant databank « Arabido\_TAIR10\_Ch1\_Mito » of Galaxy: 1,803 OTUs were kept after this step, corresponding to 7.1% of the clusters and to 89.5% of all sequences. Taxonomic affiliation of each OTU's seed was carried out using the « FROGS\_5 Taxonomic affiliation » tool with « 16S\_SILVA\_Pintail80\_138.1 » as the reference database. Both BLAST assignments were performed, 1,605 OTUs have been affiliated, corresponding to 89.0% of the clusters and 97.5% of all remaining sequences.

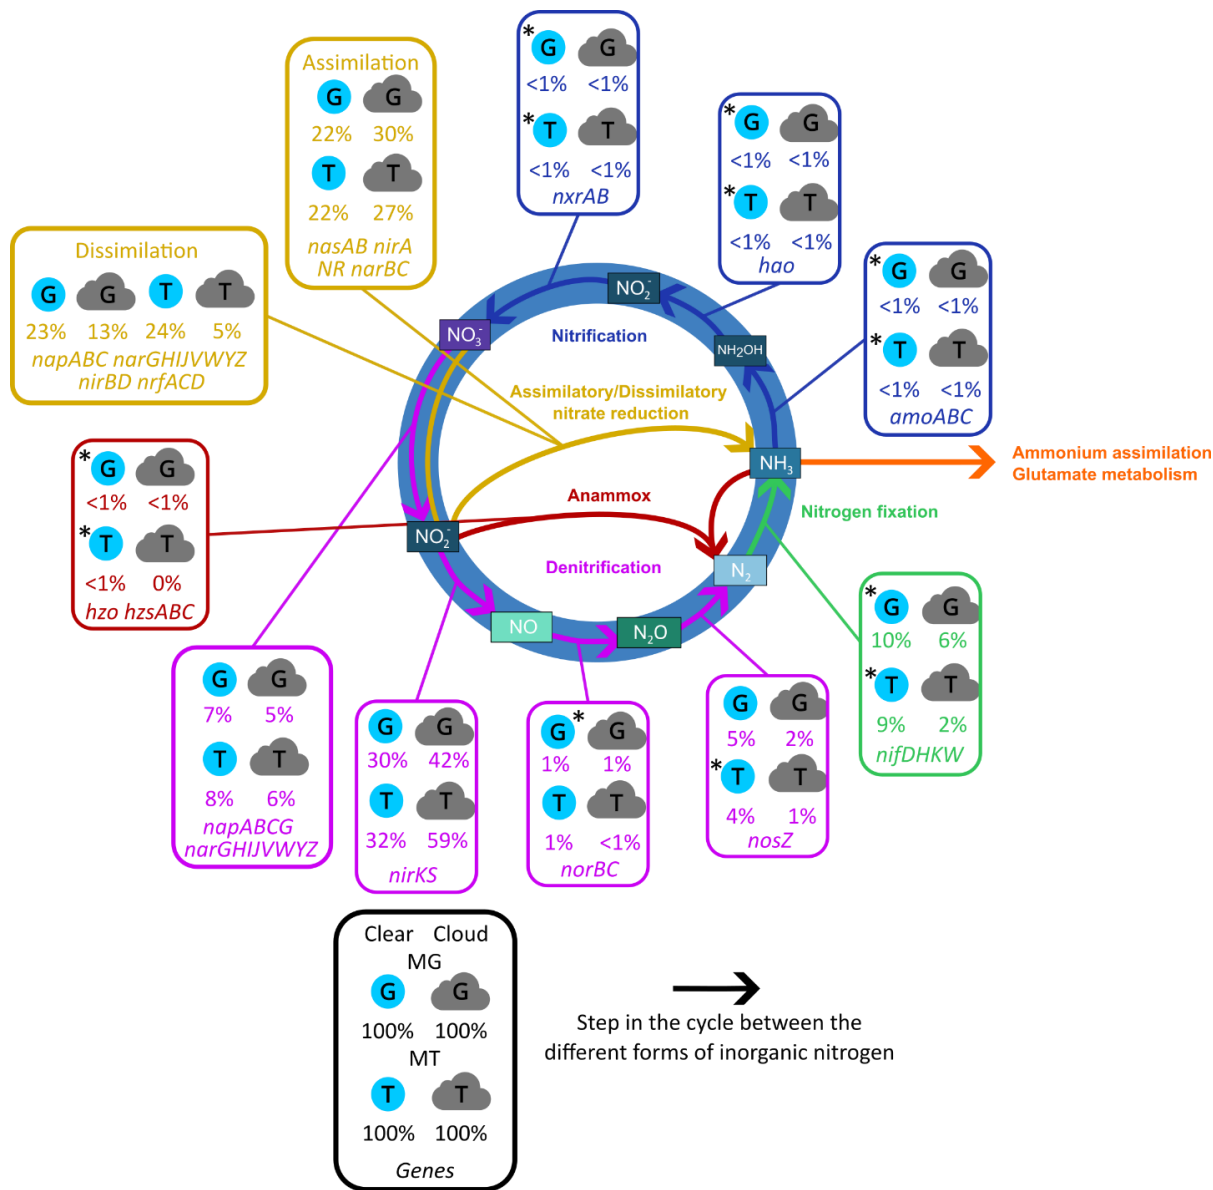

Figure S1. Representation of inorganic nitrogen cycle mediated by microorganisms in the atmosphere. Colors correspond to different steps in inorganic nitrogen cycle processes by atmospheric microorganisms with biomarker genes associated tested: green corresponds to biological nitrogen fixation, blue to nitrification, purple to denitrification, yellow to assimilatory/dissimilatory nitrate reduction, red to anammox and the output of the inorganic cycle with ammonium assimilation in orange. The grey cloud indicates the cloud conditions, and the blue circle indicates the clear atmosphere. Asterisks (\*) indicate significant differences between clear atmosphere and cloud condition in metagenomes (MG) and metatranscriptomes (MT) ( $p < 0.05$  Mann-Whitney test).

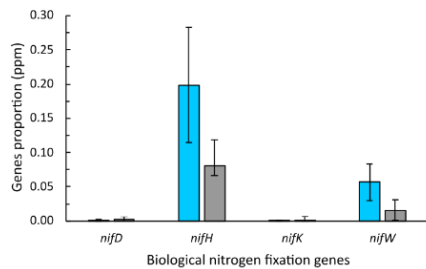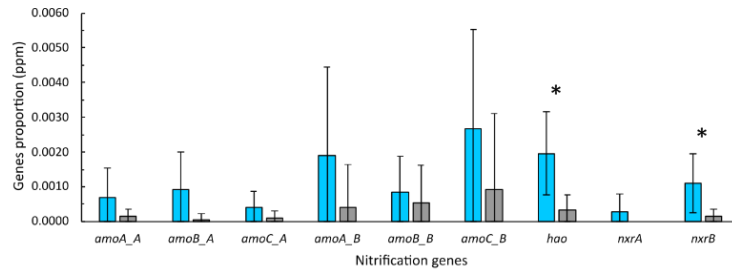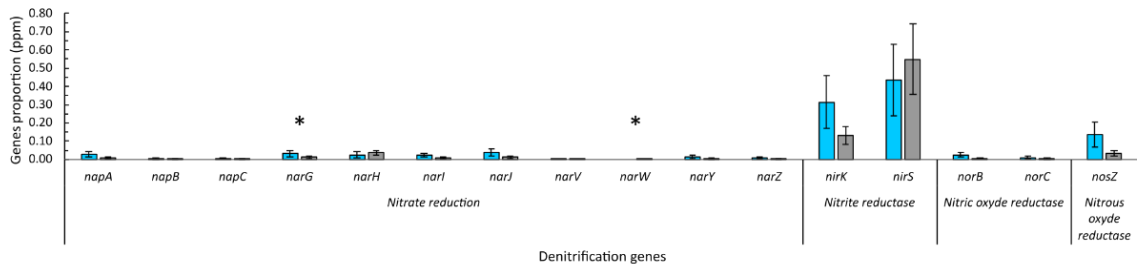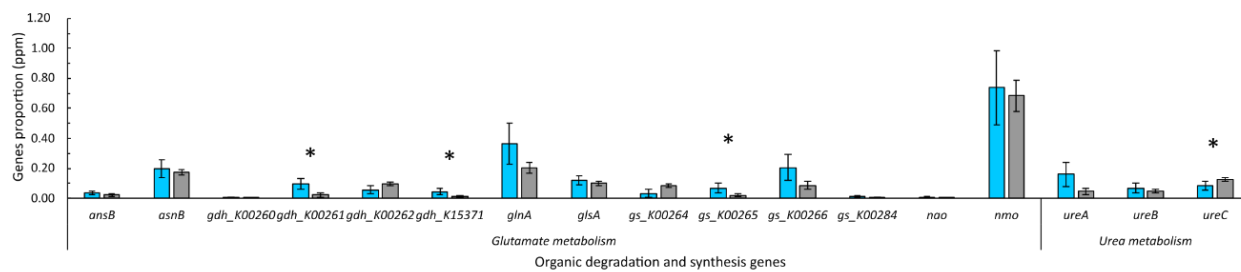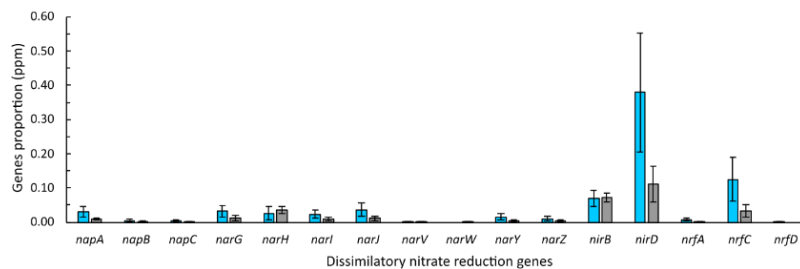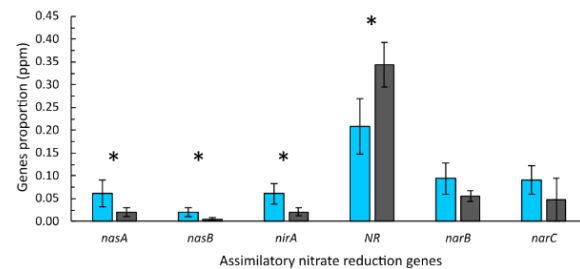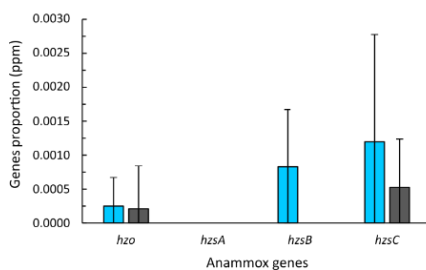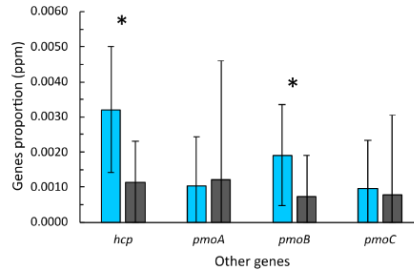

■ Clear MG ■ Cloud MG

**Figure S2. Proportion of different biomarker genes associated with steps in inorganic nitrogen cycle processes by atmospheric microorganisms in metagenomes (MG). The grey indicates the cloud condition, and the blue indicates the clear atmosphere condition. Asterisks (\*) indicate significant differences between clear atmosphere and cloud (p<0.05 Mann-Whitney test).**

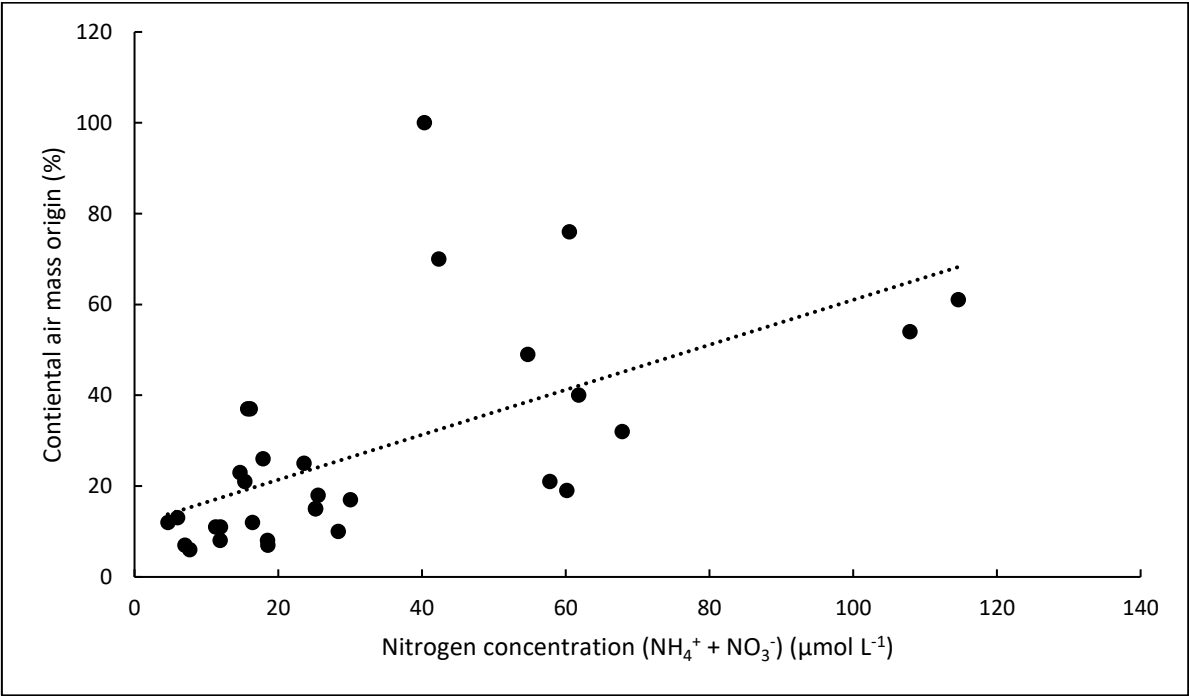

**Figure S3. Relationship between concentration of nitrogen-containing ions (NH<sub>4</sub><sup>+</sup> + NO<sub>3</sub><sup>-</sup>) in μmol L<sup>-1</sup> and air mass origin (percentage of continental origin), linear fit R<sup>2</sup>=0.3551 ; p<0.05, Pearson test).**

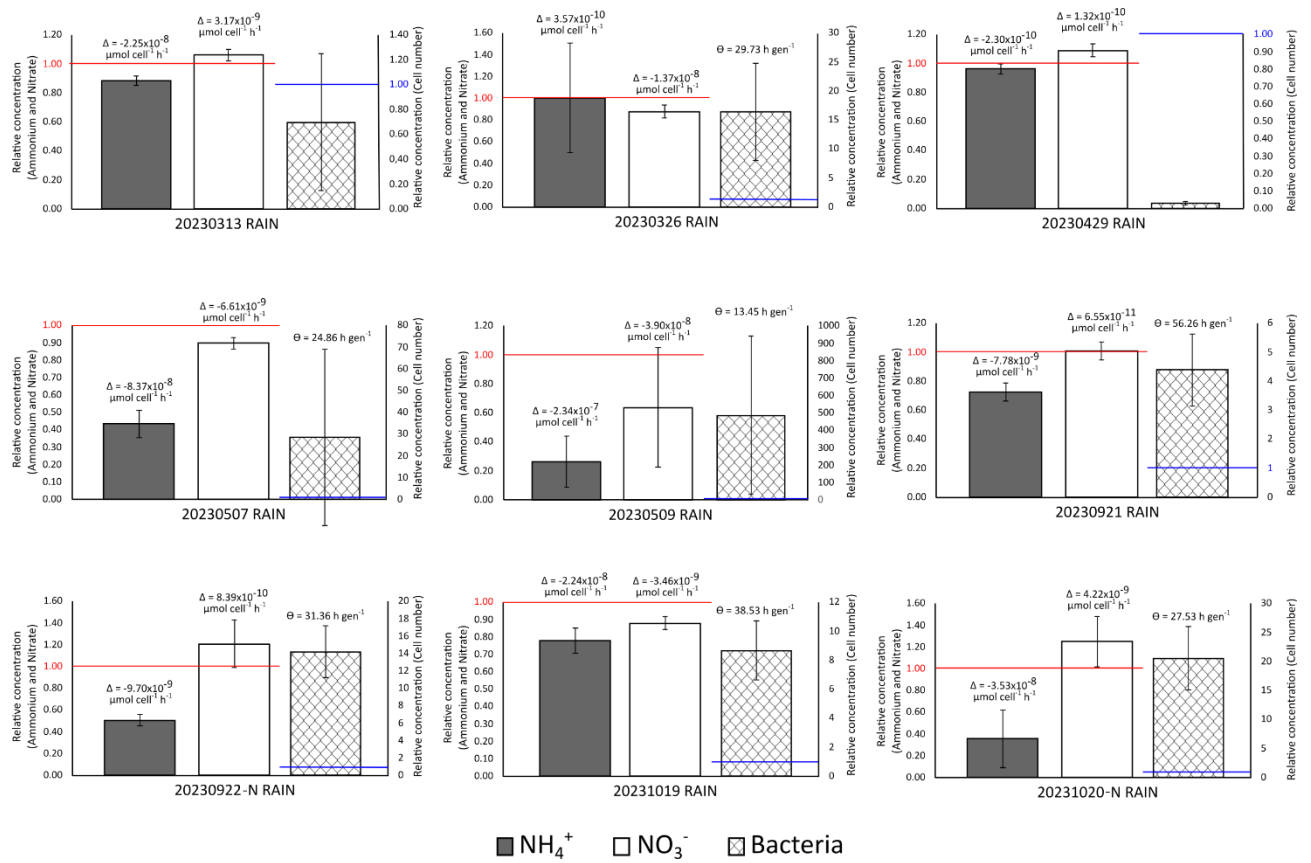

**Figure S4. Evolution of ammonium concentration (grey bars), nitrate concentration (white bars) and microbial growth (hatched bars) during incubation indicated by  $t_f/t_0$  ratio,  $t_0$  means the start of incubation and  $t_f$  means the end of incubation, after 5 days at 17°C and 130 rpm; the blue and red lines correspond to unity ratio for ammonium and nitrate and for the number of bacteria, respectively;  $\Delta$  and  $\Theta$  are average ammonium or nitrate bioassimilation rates and bacteria generation times, respectively (Equations X and Y in main text).**

**Table S1: Atmospheric bacteria strains tested for their diazotrophic capacities**

| Most identification                  | probable | Bacteria strain | Date sampling (dd/mm/yyyy) | Isolated from        | GenBank accession number (16S rDNA) | Diazotrophic activity ( <i>nifH</i> gene presence) | Reference                |
|--------------------------------------|----------|-----------------|----------------------------|----------------------|-------------------------------------|----------------------------------------------------|--------------------------|
| <i>Rhodococcus enclensis</i>         |          | 23b-28          | 13/12/2007                 | Cloud pdD            | OM827279                            | -                                                  | Renard et al., 2016      |
| <i>Pseudomonas abietaniphila</i>     |          | 58b-25          | 25/06/2012                 | Cloud pdD            | KR922137                            | -                                                  | Renard et al., 2016      |
| <i>Pseudomonas reactans</i>          |          | 47b-7           | 31/03/2011                 | Cloud pdD            | JN176591.1                          | -                                                  | Vinatier et al., 2016    |
| <i>Roseomonas gilardii</i>           |          | 31b-6           | 30/03/2009                 | Cloud pdD            | HQ256827.1                          | -                                                  | Vaïtilingom et al., 2012 |
| <i>Pseudomonas syringae</i>          |          | 32b-74          | 03/11/2009                 | Cloud pdD            | HQ256872.1                          | -                                                  | Vaïtilingom et al., 2012 |
| <i>Sphingomonas</i> sp.              |          | 63b-36          | 29/01/2013                 | Cloud pdD            | KR922234                            | -                                                  | Renard et al., 2016      |
| <i>Bosea massiliensis</i>            |          | R17b-4          | 22/03/2019                 | Cloud Reunion island | MW631990                            | -                                                  | Charpentier et al., 2024 |
| <i>Rhizobium</i> sp.                 |          | R8b-4           | 03/2019                    | Cloud Reunion island | MW711701                            | -                                                  | Charpentier et al., 2024 |
| <i>Methylobacterium</i> sp.          |          | R17b-9          | 22/03/2019                 | Cloud Reunion island | MW631995                            | +                                                  | Charpentier et al., 2024 |
| <i>Massilia</i> sp.                  |          | R18b-6          | 26/03/2019                 | Cloud Reunion island | MW632001                            | -                                                  | Charpentier et al., 2024 |
| <i>Skermanella aerolata</i>          |          | 74b-1           | 16/02/2016                 | Cloud pdD            | OM827391                            | -                                                  | This study               |
| <i>Falsirhodobacter halotolerans</i> |          | R7b-1           | 03/2019                    | Cloud Reunion island | MW711418                            | -                                                  | Charpentier et al., 2024 |
| <i>Pantoea</i> sp.                   |          | R15b-21         | 19/03/2019                 | Cloud Reunion island | MW631972                            | -                                                  | Charpentier et al., 2024 |
| <i>Pseudomonas graminis</i>          |          | 13b-3           | 07/07/2004                 | Cloud pdD            | DQ512786.1                          | -                                                  | Amato et al., 2007       |
| <i>Pseudomonas viridiflava</i>       |          | 14b-14          | 23/09/2004                 | Cloud pdD            | DQ512797.1                          | -                                                  | Amato et al., 2007       |
| <i>Pseudomonas coleopterorum</i>     |          | 27b-3           | 09/10/2008                 | Cloud pdD            | HQ256813.1                          | -                                                  | Vaïtilingom et al., 2012 |
| <i>Pseudomonas fluorescens</i>       |          | 32b-26          | 03/11/2009                 | Cloud pdD            | OM827287                            | -                                                  | This study               |
| <i>Pseudomonas extremaustralis</i>   |          | 50b-8           | 07/07/2011                 | Cloud pdD            | KR922074                            | -                                                  | Renard et al., 2016      |
| <i>Pseudomonas amygdali</i>          |          | 50b-6           | 07/07/2011                 | Cloud pdD            | KR922072                            | -                                                  | Renard et al., 2016      |
| <i>Pseudomonas congelans</i>         |          | 57b-1           | 18/04/2012                 | Cloud pdD            | KR922105                            | -                                                  | Renard et al., 2016      |
| <i>Pseudomonas cannabina</i>         |          | 59b-3           | 13/09/2012                 | Cloud pdD            | KR922141                            | -                                                  | Renard et al., 2016      |
| <i>Sphingomonas</i> sp.              |          | 32b-11          | 03/11/2009                 | Cloud pdD            | HQ256831.1                          | -                                                  | Vaïtilingom et al., 2012 |
| <i>Sphingomonas</i> sp.              |          | 32b-57          | 03/11/2009                 | Cloud pdD            | HQ256855.1                          | -                                                  | Vaïtilingom et al., 2012 |
| <i>Sphingomonas</i> sp.              |          | 3b-10           | 11/12/2003                 | Cloud pdD            | DQ512744.1                          | -                                                  | Amato et al., 2007       |
| <i>Sphingomonas</i> sp.              |          | 12b-4           | 26/04/2004                 | Cloud pdD            | DQ512779.1                          | +                                                  | Amato et al., 2007       |
| <i>Sphingomonas</i> sp.              |          | 32b-4           | 03/11/2009                 | Cloud pdD            | HQ256841.1                          | +                                                  | Vaïtilingom et al., 2012 |
| <i>Sphingobium</i> sp.               |          | 35b-9           | 31/03/2010                 | Cloud pdD            | JF706522                            | -                                                  | Vaïtilingom et al., 2012 |
| <i>Sphingomonas</i> sp.              |          | 60b-7           | 10/10/2012                 | Cloud pdD            | KR922185                            | -                                                  | Renard et al., 2016      |
| <i>Sphingomonas</i> sp.              |          | 60b-19          | 10/10/2012                 | Cloud pdD            | KR922194                            | -                                                  | Renard et al., 2016      |

|                                     |         |            |                      |          |   |                          |
|-------------------------------------|---------|------------|----------------------|----------|---|--------------------------|
| <i>Sphingomonas</i> sp.             | 63b-26  | 29/01/2013 | Cloud pdD            | KR922228 | + | Renard et al., 2016      |
| <i>Sphingomonas</i> sp.             | 63b-45  | 29/01/2013 | Cloud pdD            | KR922242 | - | Renard et al., 2016      |
| <i>Sphingomonas</i> sp.             | 67b-24  | 19/02/2014 | Cloud pdD            | KR922266 | - | Renard et al., 2016      |
| <i>Novosphingobium</i> sp.          | 69b-29  | 14/11/2014 | Cloud pdD            | OM827358 | + | This study               |
| <i>Sphingomonas pseudosanguinis</i> | R10b-14 | 03/2019    | Cloud Reunion island | MW711687 | - | Charpentier et al., 2024 |

58

59

**Table S2. Average gene proportion in atmospheric (Clear atmosphere or Cloud) metagenomes (MG) and metatranscriptomes (MT) in ppbbp (proportion per billion base pairs) for all genes tested with NCycDB. The column “All inorganic nitrogen gene” correspond to the addition of all inorganic nitrogen steps proportion. The column “All Nitrogen gene” correspond to the addition of all inorganic + organic nitrogen steps proportion.**

| Average gene proportions (ppbbp) | Nitrification      |                            |                              |                          | Denitrification   |                   |                   |                        | Assimilatory nitrate reduction | Dissimilatory nitrate reduction | Nitrogen fixation | Anammox | Organic degradation and synthesis |                 | Others | All inorganic nitrogen gene | All Nitrogen gene |
|----------------------------------|--------------------|----------------------------|------------------------------|--------------------------|-------------------|-------------------|-------------------|------------------------|--------------------------------|---------------------------------|-------------------|---------|-----------------------------------|-----------------|--------|-----------------------------|-------------------|
|                                  | Air mass condition | Ammonia oxidation (Archae) | Ammonia oxidation (Bacteria) | Hydroxyl-amine oxidation | Nitrite oxydation | Nitrate reduction | Nitrite reductase | Nitric oxyde reductase | Nitrous oxyde reductase        |                                 |                   |         | Glutamate metabolism              | Urea metabolism |        |                             |                   |
| CLEAR MG                         | 2                  | 5                          | 2                            | 1                        | 181               | 748               | 36                | 136                    | 535                            | 582                             | 257               | 2       | 1982                              | 308             | 7      | 2497                        | 4788              |
| CLOUD MG                         | 0                  | 2                          | 0                            | 0                        | 88                | 681               | 9                 | 35                     | 492                            | 216                             | 99                | 1       | 1517                              | 219             | 4      | 1628                        | 3364              |
| CLEAR MT                         | 6                  | 4                          | 4                            | 2                        | 570               | 2099              | 44                | 251                    | 1437                           | 1579                            | 619               | 0       | 6123                              | 890             | 10     | 6627                        | 13639             |
| CLOUD MT                         | 0                  | 0                          | 0                            | 0                        | 292               | 2787              | 12                | 46                     | 1261                           | 254                             | 105               | 0       | 3127                              | 199             | 3      | 4762                        | 8088              |
| MG                               | 1                  | 4                          | 1                            | 1                        | 135               | 715               | 23                | 86                     | 514                            | 399                             | 178               | 2       | 1750                              | 264             | 5      | 2062                        | 4076              |
| MT                               | 3                  | 2                          | 2                            | 1                        | 431               | 2443              | 28                | 149                    | 1349                           | 917                             | 362               | 0       | 4625                              | 544             | 7      | 5694                        | 10863             |

**Table S3: Characteristics of rain sample, collected in Theix station 881m altitude asl. N.A.: not available.**



| Sample identifier<br>(yyyymmdd) | Sample<br>volume<br>(mL) | Air<br>temperature<br>(°C) daily<br>average | NH <sub>4</sub> <sup>+</sup><br>(μmol L <sup>-1</sup> ) | NO <sub>3</sub> <sup>-</sup><br>(μmol L <sup>-1</sup> ) | Na <sup>+</sup><br>(μmol L <sup>-1</sup> ) | K <sup>+</sup><br>(μmol L <sup>-1</sup> ) | Mg <sub>2</sub> <sup>+</sup><br>(μmol L <sup>-1</sup> ) | Ca <sub>2</sub> <sup>+</sup><br>(μmol L <sup>-1</sup> ) | Cl <sup>-</sup><br>(μmol L <sup>-1</sup> ) | SO <sub>4</sub> <sup>2-</sup><br>(μmol L <sup>-1</sup> ) | PO <sub>4</sub> <sup>3-</sup><br>(μmol L <sup>-1</sup> ) | pH   | Cell<br>concentration<br>(cells mL) | Air Mass<br>Direction |
|---------------------------------|--------------------------|---------------------------------------------|---------------------------------------------------------|---------------------------------------------------------|--------------------------------------------|-------------------------------------------|---------------------------------------------------------|---------------------------------------------------------|--------------------------------------------|----------------------------------------------------------|----------------------------------------------------------|------|-------------------------------------|-----------------------|
| 20230109_RAIN                   | 157                      | 2                                           | 19.7                                                    | 5.8                                                     | 80.4                                       | 7.2                                       | 5.1                                                     | 0.2                                                     | 100.9                                      | 5.0                                                      | 2.2                                                      | 5.8  | 6.47×10 <sup>3</sup>                | NWW                   |
| 20230121_RAIN                   | 66                       | -3.3                                        | 24.6                                                    | 30.1                                                    | 28.3                                       | 9.9                                       | 2.6                                                     | 1.0                                                     | 31.8                                       | 2.6                                                      | 2.2                                                      | 5.4  | 1.70×10 <sup>3</sup>                | NNW/NNE               |
| 20230308_RAIN                   | 231                      | 8.3                                         | 22.0                                                    | 8.0                                                     | 8.1                                        | 3.1                                       | 0.8                                                     | 0.0                                                     | 9.3                                        | 2.1                                                      | 2.2                                                      | 6.06 | 6.61×10 <sup>2</sup>                | SSW                   |
| 20230309_RAIN                   | 132                      | 8.4                                         | 21.9                                                    | 6.4                                                     | 24.5                                       | 2.4                                       | 2.0                                                     | 0.0                                                     | 29.7                                       | 2.4                                                      | 2.2                                                      | 6.05 | 1.18×10 <sup>4</sup>                | SSW                   |
| 20230310_RAIN                   | 839                      | 5.9                                         | 4.6                                                     | 1.4                                                     | 22.1                                       | 4.0                                       | 1.4                                                     | 0.0                                                     | 26.5                                       | 1.3                                                      | 2.2                                                      | 5.96 | 1.94×10 <sup>2</sup>                | NWW/SWW               |
| 20230311_RAIN                   | 810                      | 9.8                                         | 5.6                                                     | 1.4                                                     | 12.7                                       | 7.7                                       | 0.7                                                     | 0.0                                                     | 13.1                                       | 0.5                                                      | 2.2                                                      | 5.91 | 1.96×10 <sup>2</sup>                | SWW                   |
| 20230313_RAIN                   | 270                      | 11.9                                        | 48.7                                                    | 13.1                                                    | 8.5                                        | 4.2                                       | 1.0                                                     | 1.7                                                     | 8.6                                        | 5.4                                                      | 2.2                                                      | 5.88 | 2.08×10 <sup>3</sup>                | SWW                   |
| 20230314_RAIN                   | 239                      | 4.7                                         | 15.8                                                    | 2.7                                                     | 29.9                                       | 2.1                                       | 2.6                                                     | 0.9                                                     | 34.4                                       | 2.3                                                      | 2.2                                                      | 5.96 | 8.06×10 <sup>2</sup>                | NWW/SWW               |
| 20230326_RAIN                   | 354                      | 5.6                                         | 13.1                                                    | 3.3                                                     | 23.2                                       | 5.7                                       | 1.8                                                     | 0.7                                                     | 26.3                                       | 1.9                                                      | 2.5                                                      | 5.69 | 2.49×10 <sup>2</sup>                | SWW                   |
| 20230429_RAIN                   | 382                      | 13                                          | 48.4                                                    | 12.0                                                    | 3.2                                        | 1.7                                       | 0.9                                                     | 0.0                                                     | 4.7                                        | 5.3                                                      | 2.2                                                      | 6.21 | 6.73×10 <sup>4</sup>                | SWW/SSW               |
| 20230501_RAIN                   | 70                       | 9                                           | 53.8                                                    | 14.0                                                    | 4.1                                        | 3.6                                       | 1.1                                                     | 0.3                                                     | 5.1                                        | 5.5                                                      | 2.5                                                      | 6.05 | 1.33×10 <sup>3</sup>                | NWW                   |
| 20230505_RAIN                   | 129                      | 11.3                                        | 76.0                                                    | 31.9                                                    | 20.1                                       | 6.1                                       | 3.6                                                     | 10.6                                                    | 16.6                                       | 10.3                                                     | 2.6                                                      | 6.01 | 3.92×10 <sup>2</sup>                | SWW                   |
| 20230506_RAIN                   | 178                      | 13.8                                        | 79.8                                                    | 34.8                                                    | 15.3                                       | 6.4                                       | 2.9                                                     | 3.2                                                     | 14.6                                       | 7.9                                                      | 3.8                                                      | N.A. | 2.30×10 <sup>3</sup>                | SWW/SSW               |
| 20230507_RAIN                   | 819                      | 11.6                                        | 16.5                                                    | 7.1                                                     | 56.4                                       | 33.5                                      | 1.7                                                     | 0.6                                                     | 58.5                                       | 2.1                                                      | 2.6                                                      | N.A. | 9.29×10 <sup>2</sup>                | SWW                   |
| 20230509_RAIN                   | 284                      | 11.2                                        | 13.8                                                    | 4.7                                                     | 0.6                                        | 2.3                                       | 0.9                                                     | 0.2                                                     | 2.2                                        | 1.4                                                      | 2.4                                                      | 5.57 | 3.63×10 <sup>2</sup>                | SWW                   |
| 20230511_RAIN                   | 181                      | 6.8                                         | 12.6                                                    | 3.4                                                     | 14.4                                       | 6.8                                       | 1.2                                                     | 1.0                                                     | 13.6                                       | 1.9                                                      | 2.2                                                      | N.A. | 6.07×10 <sup>3</sup>                | NWW                   |
| 20230512_RAIN                   | 957                      | 7.2                                         | 27.0                                                    | 15.3                                                    | 5.2                                        | 1.2                                       | 0.9                                                     | 0.7                                                     | 5.7                                        | 3.5                                                      | 2.2                                                      | 5.42 | 1.44×10 <sup>3</sup>                | NNE/NWW               |
| 20230513_RAIN                   | 190                      | 8.8                                         | 23.5                                                    | 16.9                                                    | 3.3                                        | 1.8                                       | 1.0                                                     | 1.4                                                     | 3.1                                        | 3.5                                                      | 2.2                                                      | 5.48 | 3.49×10 <sup>3</sup>                | NEE/NNE               |
| 20230918_RAIN                   | 107                      | 16.6                                        | 10.8                                                    | 4.5                                                     | *                                          | 0.6                                       | 1.0                                                     | 3.1                                                     | *                                          | 0.9                                                      | 2.2                                                      | 5.45 | 4.01×10 <sup>2</sup>                | SWW                   |
| 20230921_RAIN                   | 270                      | 13.2                                        | 45.6                                                    | 12.2                                                    | 3.4                                        | 0.9                                       | 1.3                                                     | 0.9                                                     | 2.6                                        | 3.4                                                      | 2.5                                                      | 5.47 | 1.35×10 <sup>4</sup>                | SWW                   |
| 20230922_RAIN                   | 112                      | 10.2                                        | 10.2                                                    | 1.8                                                     | 15.2                                       | 0.6                                       | 2.0                                                     | 0.2                                                     | 16.9                                       | 1.8                                                      | 3.0                                                      | 5.82 | 9.48×10 <sup>3</sup>                | NWW/SWW               |
| 20230922_RAIN                   | 149                      | 10.2                                        | 9.3                                                     | 1.9                                                     | 15.5                                       | 0.5                                       | 1.7                                                     | *                                                       | 19.1                                       | 1.9                                                      | 2.4                                                      | 5.55 | 3.96×10 <sup>3</sup>                | NWW/SWW               |
| 20231018_RAIN                   | 159                      | 15                                          | 12.0                                                    | 2.6                                                     | 2.0                                        | 0.8                                       | 1.1                                                     | 0.0                                                     | 1.8                                        | 1.2                                                      | 2.3                                                      | N.A. | 6.45×10 <sup>3</sup>                | SWW                   |
| 20231019_RAIN                   | 164                      | 14.2                                        | 46.8                                                    | 13.3                                                    | 2.5                                        | 1.0                                       | 0.6                                                     | 0.0                                                     | 3.9                                        | 3.8                                                      | 2.3                                                      | N.A. | 3.89×10 <sup>3</sup>                | SWW                   |
| 20231020_RAIN                   | 221                      | 11                                          | 6.7                                                     | 1.0                                                     | 0.0                                        | 0.9                                       | 0.7                                                     | 0.6                                                     | 0.5                                        | 0.1                                                      | 3.1                                                      | N.A. | 2.00×10 <sup>3</sup>                | NWW                   |
| 20231020_RAIN                   | 169                      | 11                                          | 13.7                                                    | 4.2                                                     | 0.0                                        | 0.6                                       | 0.6                                                     | 0.0                                                     | 0.4                                        | 0.6                                                      | 2.7                                                      | N.A. | 2.08×10 <sup>3</sup>                | SWW                   |
| 20231023_RAIN                   | 126                      | 10.7                                        | 11.4                                                    | 4.3                                                     | 5.8                                        | 1.2                                       | 1.7                                                     | 8.4                                                     | 6.8                                        | 2.3                                                      | 2.3                                                      | 6.07 | 4.05×10 <sup>3</sup>                | SWW/SSW               |
| 20231025_RAIN                   | 150                      | 11.3                                        | 9.6                                                     | 2.2                                                     | 0.0                                        | 0.3                                       | 0.6                                                     | 0.0                                                     | 0.4                                        | 0.4                                                      | 2.2                                                      | 6.15 | 1.87×10 <sup>3</sup>                | NWW/SWW               |
| 20231026_RAIN                   | 489                      | 10.9                                        | 23.6                                                    | 1.6                                                     | 1.9                                        | 19.5                                      | 1.5                                                     | 0.0                                                     | 4.9                                        | 2.5                                                      | 6.7                                                      | 5.94 | 5.93×10 <sup>3</sup>                | SWW                   |
| 20231027_RAIN                   | 78                       | 8.5                                         | 3.3                                                     | 1.3                                                     | 1.4                                        | 0.2                                       | 0.3                                                     | 0.0                                                     | 4.3                                        | 0.6                                                      | 2.2                                                      | 6.01 | 1.79×10 <sup>3</sup>                | NWW/SWW               |
| <b>Mean</b>                     | 283                      | 9.6                                         | 24.4                                                    | 8.8                                                     | 14.1                                       | 4.6                                       | 1.5                                                     | 1.2                                                     | 16.1                                       | 2.8                                                      | 2.6                                                      | 5.82 | 5.44×10 <sup>3</sup>                | -                     |
| <b>Median</b>                   | 180                      | 10.5                                        | 16.1                                                    | 4.6                                                     | 8.1                                        | 2.2                                       | 1.2                                                     | 0.3                                                     | 8.6                                        | 2.2                                                      | 2.3                                                      | 5.91 | 2.04×10 <sup>3</sup>                | -                     |
| <b>Min</b>                      | 66                       | -3.3                                        | 3.3                                                     | 1.0                                                     | 0.0                                        | 0.2                                       | 0.3                                                     | 0.0                                                     | 0.4                                        | 0.1                                                      | 2.2                                                      | 5.4  | 1.94×10 <sup>2</sup>                | -                     |
| <b>Max</b>                      | 957                      | 16.6                                        | 79.8                                                    | 34.8                                                    | 80.4                                       | 33.5                                      | 5.1                                                     | 10.6                                                    | 100.9                                      | 10.3                                                     | 6.7                                                      | 6.21 | 6.73×10 <sup>4</sup>                | -                     |
| <b>Standard deviation</b>       | 248                      | 4.0                                         | 20.4                                                    | 9.3                                                     | 17.9                                       | 6.8                                       | 1.0                                                     | 2.5                                                     | 21.1                                       | 2.3                                                      | 0.9                                                      | 0.26 | 1.22×10 <sup>4</sup>                | -                     |

Table S4. Correlations between the main factors tested on fresh rainwater samples (Table S3). The correlation tested is the Spearman correlation with the pvalue of the statistical test on the upper half and the Spearman score on the lower half.

|                 | Spearman rs                                           | pvalue             |                                    |                                                      |                                                      |                                         |                                        |                                          |                                          |                                         |                                                       |                                                       |       |                                              |
|-----------------|-------------------------------------------------------|--------------------|------------------------------------|------------------------------------------------------|------------------------------------------------------|-----------------------------------------|----------------------------------------|------------------------------------------|------------------------------------------|-----------------------------------------|-------------------------------------------------------|-------------------------------------------------------|-------|----------------------------------------------|
|                 |                                                       | Sample volume (mL) | Air temperature (°C) daily average | NH <sub>4</sub> <sup>+</sup> (μmol L <sup>-1</sup> ) | NO <sub>3</sub> <sup>-</sup> (μmol L <sup>-1</sup> ) | Na <sup>+</sup> (μmol L <sup>-1</sup> ) | K <sup>+</sup> (μmol L <sup>-1</sup> ) | Mg <sup>2+</sup> (μmol L <sup>-1</sup> ) | Ca <sup>2+</sup> (μmol L <sup>-1</sup> ) | Cl <sup>-</sup> (μmol L <sup>-1</sup> ) | SO <sub>4</sub> <sup>2-</sup> (μmol L <sup>-1</sup> ) | PO <sub>4</sub> <sup>3-</sup> (μmol L <sup>-1</sup> ) | pH    | Cell concentration (cells mL <sup>-1</sup> ) |
| Statistic score | Sample volume (mL)                                    |                    | 0.96                               | 0.75                                                 | 0.62                                                 | 0.95                                    | 0.06                                   | 0.37                                     | 0.36                                     | 0.94                                    | 0.94                                                  | 0.99                                                  | 0.76  | 0.25                                         |
|                 | Air temperature (°C) daily average                    | -0.01              |                                    | 0.29                                                 | 0.43                                                 | 0.01                                    | 0.09                                   | 0.13                                     | 0.85                                     | 1.88E-03                                | 0.88                                                  | 0.04                                                  | 0.55  | 0.26                                         |
|                 | NH <sub>4</sub> <sup>+</sup> (μmol L <sup>-1</sup> )  | 0.06               | 0.20                               |                                                      | 1.61E-10                                             | 0.55                                    | 0.03                                   | 0.16                                     | 0.09                                     | 0.82                                    | 4.43E-12                                              | 0.44                                                  | 0.90  | 0.31                                         |
|                 | NO <sub>3</sub> <sup>-</sup> (μmol L <sup>-1</sup> )  | -0.09              | 0.15                               | 0.88                                                 |                                                      | 0.28                                    | 0.11                                   | 0.20                                     | 0.01                                     | 0.62                                    | 3.51E-08                                              | 0.83                                                  | 0.33  | 0.75                                         |
|                 | Na <sup>+</sup> (μmol L <sup>-1</sup> )               | -0.01              | -0.49                              | 0.12                                                 | 0.21                                                 |                                         | 1.06E-03                               | 1.38E-07                                 | 0.05                                     | 3.62E-19                                | 0.08                                                  | 0.35                                                  | 0.36  | 0.46                                         |
|                 | K <sup>+</sup> (μmol L <sup>-1</sup> )                | 0.35               | -0.31                              | 0.40                                                 | 0.30                                                 | 0.58                                    |                                        | 0.01                                     | 0.29                                     | 8.24E-04                                | 0.02                                                  | 0.90                                                  | 0.82  | 0.22                                         |
|                 | Mg <sup>2+</sup> (μmol L <sup>-1</sup> )              | -0.17              | -0.28                              | 0.26                                                 | 0.24                                                 | 0.81                                    | 0.48                                   |                                          | 0.01                                     | 9.16E-07                                | 0.01                                                  | 0.28                                                  | 0.41  | 0.47                                         |
|                 | Ca <sup>2+</sup> (μmol L <sup>-1</sup> )              | -0.17              | 0.04                               | 0.32                                                 | 0.49                                                 | 0.37                                    | 0.20                                   | 0.48                                     |                                          | 0.16                                    | 0.03                                                  | 0.61                                                  | 0.05  | 0.63                                         |
|                 | Cl <sup>-</sup> (μmol L <sup>-1</sup> )               | -0.01              | -0.55                              | 0.04                                                 | 0.10                                                 | 0.97                                    | 0.59                                   | 0.77                                     | 0.27                                     |                                         | 0.16                                                  | 0.38                                                  | 0.57  | 0.40                                         |
|                 | SO <sub>4</sub> <sup>2-</sup> (μmol L <sup>-1</sup> ) | -0.01              | 0.03                               | 0.91                                                 | 0.82                                                 | 0.33                                    | 0.43                                   | 0.46                                     | 0.41                                     | 0.27                                    |                                                       | 0.83                                                  | 0.93  | 0.17                                         |
|                 | PO <sub>4</sub> <sup>3-</sup> (μmol L <sup>-1</sup> ) | 0.00               | 0.38                               | 0.14                                                 | -0.04                                                | -0.18                                   | 0.02                                   | 0.20                                     | 0.10                                     | -0.17                                   | 0.04                                                  |                                                       | 0.81  | 0.59                                         |
|                 | pH                                                    | -0.07              | 0.13                               | -0.03                                                | -0.21                                                | -0.20                                   | -0.05                                  | -0.18                                    | -0.43                                    | -0.13                                   | -0.02                                                 | -0.05                                                 |       | 0.62                                         |
|                 | Cell concentration (cells mL <sup>-1</sup> )          | -0.22              | 0.21                               | 0.19                                                 | 0.06                                                 | -0.14                                   | -0.23                                  | 0.14                                     | -0.09                                    | -0.16                                   | 0.26                                                  | 0.10                                                  | -0.05 |                                              |

76  
77

**Table S5. Correlations between the main factors tested on rainwater incubation samples (Table S3). The correlation tested is the Spearman correlation with the pvalue of the statistical test on the upper half and the Spearman score on the lower half.**

|                 | Spearman rs                                  | Cells concentration (cell mL <sup>-1</sup> ) | BHL   | Sample volume | T*°   | Na+ (μmol L <sup>-1</sup> ) | NH4+ (μmol L <sup>-1</sup> ) | K+ (μmol L <sup>-1</sup> ) | Mg2+ (μmol L <sup>-1</sup> ) | Ca2+ (μmol L <sup>-1</sup> ) | Cl- (μmol L <sup>-1</sup> ) | NO3- (μmol L <sup>-1</sup> ) | SO42- (μmol L <sup>-1</sup> ) | PO43- (μmol L <sup>-1</sup> ) | Bioassimilation rate NH4+ | Bioassimilation rate NO3- | pH    | Marine High | Marine Low | Continental High | Continental Low | Bacteria richness | Sphingomonadales (%) | Burkholderiales (%) |
|-----------------|----------------------------------------------|----------------------------------------------|-------|---------------|-------|-----------------------------|------------------------------|----------------------------|------------------------------|------------------------------|-----------------------------|------------------------------|-------------------------------|-------------------------------|---------------------------|---------------------------|-------|-------------|------------|------------------|-----------------|-------------------|----------------------|---------------------|
| Statistic score | Cells concentration (cell mL <sup>-1</sup> ) |                                              | 0.51  | 0.42          | 0.11  | 0.62                        | 0.30                         | 0.08                       | 0.47                         | 0.52                         | 0.59                        | 0.36                         | 0.19                          | 0.29                          | 0.29                      | 0.15                      | 0.96  | 0.62        | 0.02       | 0.24             | 0.95            | 0.88              | 0.02                 | 0.01                |
|                 | BHL                                          | -0.25                                        |       | 0.99          | 0.78  | 0.79                        | 0.57                         | 0.68                       | 0.96                         | 0.05                         | 0.44                        | 0.44                         | 0.87                          | 0.63                          | 0.88                      | 0.98                      | 0.71  | 0.66        | 0.68       | 0.30             | 0.84            | 0.03              | 0.91                 | 0.50                |
|                 | Sample volume                                | -0.31                                        | 0.01  |               | 0.97  | 0.34                        | 0.56                         | 0.01                       | 0.39                         | 0.71                         | 0.32                        | 0.96                         | 0.71                          | 0.83                          | 0.99                      | 0.18                      | 0.16  | 0.21        | 0.77       | 0.73             | 0.18            | 0.20              | 0.17                 | 0.88                |
|                 | T*°                                          | 0.58                                         | 0.12  | -0.02         |       | 0.49                        | 0.01                         | 0.91                       | 0.18                         | 0.89                         | 0.49                        | 0.00                         | 0.04                          | 0.24                          | 1.00                      | 0.91                      | 1.00  | 0.83        | 0.12       | 0.03             | 0.77            | 0.82              | 0.05                 | 0.10                |
|                 | Na+ (μmol L <sup>-1</sup> )                  | -0.19                                        | -0.10 | 0.36          | -0.27 |                             | 0.71                         | 0.18                       | 0.00                         | 0.09                         | 0.00                        | 0.61                         | 0.53                          | 0.83                          | 0.44                      | 0.57                      | 0.92  | 0.64        | 0.55       | 1.00             | 0.70            | 0.82              | 0.81                 | 0.63                |
|                 | NH4+ (μmol L <sup>-1</sup> )                 | 0.38                                         | 0.22  | 0.23          | 0.83  | -0.15                       |                              | 0.48                       | 0.28                         | 0.79                         | 0.79                        | 0.00                         | 0.00                          | 0.08                          | 0.96                      | 0.66                      | 0.27  | 0.39        | 0.25       | 0.06             | 0.33            | 0.70              | 0.44                 | 0.42                |
|                 | K+ (μmol L <sup>-1</sup> )                   | -0.63                                        | 0.17  | 0.80          | -0.05 | 0.50                        | 0.27                         |                            | 0.31                         | 0.28                         | 0.13                        | 0.68                         | 0.53                          | 0.94                          | 0.74                      | 0.12                      | 0.27  | 0.26        | 0.61       | 0.85             | 0.27            | 0.82              | 0.12                 | 0.50                |
|                 | Mg2+ (μmol L <sup>-1</sup> )                 | -0.28                                        | 0.03  | 0.32          | -0.49 | 0.91                        | -0.41                        | 0.38                       |                              | 0.05                         | 0.01                        | 0.22                         | 0.94                          | 0.56                          | 0.33                      | 0.42                      | 0.43  | 0.60        | 0.80       | 0.58             | 0.92            | 0.88              | 0.45                 | 0.89                |
|                 | Ca2+ (μmol L <sup>-1</sup> )                 | -0.27                                        | 0.73  | 0.16          | -0.07 | 0.66                        | 0.12                         | 0.44                       | 0.74                         |                              | 0.31                        | 0.83                         | 0.53                          | 0.89                          | 0.83                      | 0.83                      | 0.60  | 0.70        | 0.74       | 0.31             | 0.93            | 0.14              | 0.47                 | 0.52                |
|                 | Cl- (μmol L <sup>-1</sup> )                  | -0.21                                        | -0.30 | 0.38          | -0.27 | 0.95                        | -0.10                        | 0.55                       | 0.79                         | 0.41                         |                             | 0.64                         | 0.44                          | 0.89                          | 0.46                      | 0.57                      | 0.69  | 0.93        | 0.74       | 0.75             | 0.49            | 0.53              | 0.81                 | 0.63                |
|                 | NO3- (μmol L <sup>-1</sup> )                 | 0.34                                         | 0.30  | 0.03          | 0.93  | -0.20                       | 0.92                         | 0.17                       | -0.46                        | 0.10                         | -0.18                       |                              | 0.02                          | 0.18                          | 0.88                      | 0.91                      | 0.66  | 0.84        | 0.34       | 0.02             | 0.91            | 0.43              | 0.17                 | 0.42                |
|                 | SO42- (μmol L <sup>-1</sup> )                | 0.49                                         | 0.07  | 0.14          | 0.71  | 0.24                        | 0.86                         | 0.24                       | -0.03                        | 0.27                         | 0.29                        | 0.78                         |                               | 0.03                          | 0.39                      | 0.65                      | 0.33  | 0.59        | 0.14       | 0.11             | 0.34            | 0.80              | 0.44                 | 0.42                |
|                 | PO43- (μmol L <sup>-1</sup> )                | -0.39                                        | 0.19  | 0.08          | -0.44 | 0.08                        | -0.62                        | -0.03                      | 0.22                         | -0.06                        | -0.06                       | -0.49                        | -0.73                         |                               | 0.55                      | 0.82                      | 0.18  | 0.40        | 0.68       | 0.90             | 0.53            | 0.91              | 0.70                 | 0.73                |
|                 | Bioassimilation rate NH4+                    | -0.39                                        | -0.07 | -0.01         | 0.00  | -0.30                       | 0.02                         | 0.13                       | -0.36                        | -0.10                        | -0.28                       | 0.07                         | -0.33                         | 0.23                          |                           | 0.88                      | 0.71  | 0.48        | 0.61       | 0.72             | 0.42            | 0.95              | 0.03                 | 0.02                |
|                 | Bioassimilation rate NO3-                    | -0.53                                        | -0.02 | 0.49          | -0.05 | 0.22                        | -0.17                        | 0.57                       | 0.30                         | 0.10                         | 0.22                        | -0.05                        | -0.18                         | 0.09                          | 0.07                      |                           | 0.66  | 0.93        | 0.44       | 0.30             | 0.39            | 0.33              | 0.47                 | 0.78                |
|                 | pH                                           | 0.03                                         | -0.20 | 0.67          | -0.03 | -0.09                       | 0.54                         | 0.54                       | -0.41                        | -0.30                        | 0.20                        | 0.26                         | 0.49                          | -0.72                         | -0.20                     | -0.26                     |       | 0.03        | 0.66       | 0.80             | 0.02            | 0.63              | 0.92                 | 0.75                |
|                 | Marine High                                  | 0.19                                         | -0.17 | -0.46         | 0.08  | 0.18                        | -0.33                        | -0.42                      | 0.20                         | 0.17                         | 0.03                        | -0.08                        | -0.21                         | 0.32                          | 0.27                      | 0.03                      | -0.89 |             | 0.35       | 0.42             | 0.01            | 0.86              | 0.78                 | 0.81                |
|                 | Marine Low                                   | -0.79                                        | 0.17  | -0.12         | -0.57 | -0.23                       | -0.43                        | 0.20                       | -0.10                        | -0.15                        | -0.13                       | -0.37                        | -0.54                         | 0.16                          | 0.20                      | 0.30                      | 0.26  | -0.35       |            | 0.08             | 0.99            | 0.67              | 0.33                 | 0.05                |
|                 | Continental High                             | 0.44                                         | 0.39  | -0.13         | 0.74  | 0.00                        | 0.65                         | -0.08                      | -0.21                        | 0.40                         | -0.13                       | 0.75                         | 0.57                          | -0.05                         | 0.14                      | -0.39                     | -0.14 | 0.31        | -0.63      |                  | 0.85            | 0.20              | 0.36                 | 0.62                |
|                 | Continental Low                              | -0.03                                        | 0.08  | 0.50          | -0.11 | 0.15                        | 0.37                         | 0.42                       | 0.04                         | 0.05                         | 0.26                        | 0.04                         | 0.36                          | -0.24                         | -0.30                     | -0.32                     | 0.94  | -0.85       | 0.01       | -0.07            |                 | 0.77              | 0.84                 | 0.78                |
|                 | Bacteria richness                            | -0.07                                        | 0.81  | -0.56         | 0.11  | -0.11                       | 0.18                         | -0.11                      | -0.07                        | 0.70                         | -0.29                       | 0.36                         | 0.13                          | 0.06                          | 0.04                      | -0.43                     | -0.36 | 0.09        | 0.20       | 0.56             | -0.15           |                   | 0.80                 | 0.42                |
|                 | Sphingomonadales (%)                         | -0.85                                        | -0.07 | 0.59          | -0.79 | 0.11                        | -0.36                        | 0.64                       | 0.35                         | 0.33                         | 0.11                        | -0.61                        | -0.36                         | 0.18                          | 0.82                      | 0.32                      | 0.20  | -0.14       | 0.43       | -0.41            | 0.11            | -0.14             |                      | 0.07                |
|                 | Burkholderiales (%)                          | 0.88                                         | -0.32 | 0.07          | 0.68  | 0.21                        | 0.36                         | -0.32                      | 0.07                         | -0.30                        | 0.21                        | 0.36                         | 0.36                          | -0.16                         | -0.86                     | -0.14                     | 0.40  | 0.11        | -0.79      | 0.23             | 0.15            | -0.43             | -0.75                |                     |

78
