# Supplementary material
Source: Copernicus journal article supplement (doi:10.5194/bg-23-2885-2026)
Supplement: Supplementary file [file bg-23-2885-2026-supplement-title-page.pdf › bg-23-2885-2026-supplement-title-page.pdf]

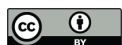

## *Supplement of*

# **Bacterial contribution to nitrogen processing in the atmosphere**

**Frédéric Mathonat et al.**

*Correspondence to:* Frédéric Mathonat (f.mathonat@brgm.fr)

- [bg-23-2885-2026-supplement-title-page.pdf](#)
- [Supplement\\_nitrogen\\_FM](#)
  - [Supplementary data.xlsx](#)
  - [Supplementary materials\\_Nitrogen\\_FM.pdf](#)

The copyright of individual parts of the supplement might differ from the article licence.
